# Supplementary material for: Thiophosphorylated bis-thioureas for competitive bulk liquid membrane transport of some metal ions
Source: Royal Society of Chemistry journal article supplement (doi:10.1039/c1ce06244a), 2011-12-03
Supplement: c1ce06244a.pdf [file c1ce06244a.pdf]

## Electronic Supplementary Information

### Thiophosphorylated bis-thioureas for competitive bulk liquid membrane transport of some metal ions

Maria G. Babashkina,<sup>\*a</sup> Damir A. Safin,<sup>a</sup> Koen Robeyns,<sup>a</sup> Anna Brzuszkiewicz,<sup>b</sup> Henryk Kozłowski<sup>b</sup> and Yann Garcia<sup>a</sup>

<sup>a</sup> Institute of Condensed Matter and Nanosciences, MOST - Inorganic Chemistry, Université Catholique de Louvain, Place L. Pasteur 1, 1348 Louvain-la-Neuve, Belgium. Fax: +32(0) 1047 2330; Tel: +32(0) 1047 2831; E-mail: maria.babashkina@ksu.ru

<sup>b</sup> Faculty of Chemistry, University of Wrocław, F. Joliot-Curie Str. 14, 50383, Wrocław, Poland.

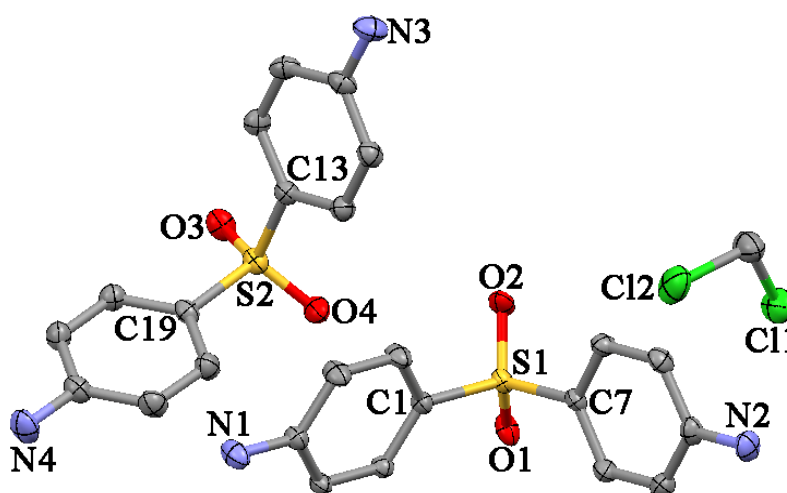

**Fig. S1** Molecular structure of 2(4-aminophenylsulfone)·CH<sub>2</sub>Cl<sub>2</sub>. Thermal ellipsoids are drawn at the 50% probability level. Hydrogen atoms were omitted for clarity.

**Table S1** Selected bond lengths (Å) and bond angles (°) for 2(4-aminophenylsulfone)·CH<sub>2</sub>Cl<sub>2</sub>

| <i>Bond lengths</i> |           |                 |           |                  |           |
|---------------------|-----------|-----------------|-----------|------------------|-----------|
| S(1)–O(1)           | 1.458(2)  | S(1)–C(1)       | 1.748(2)  | N(1)–C(4)        | 1.353(3)  |
| S(1)–O(2)           | 1.442(2)  | S(1)–C(7)       | 1.748(2)  | N(2)–C(10)       | 1.372(3)  |
| S(2)–O(3)           | 1.458(2)  | S(2)–C(13)      | 1.748(2)  | N(3)–C(16)       | 1.375(3)  |
| S(2)–O(4)           | 1.444(2)  | S(2)–C(19)      | 1.752(2)  | N(4)–C(22)       | 1.360(3)  |
| <i>Bond angles</i>  |           |                 |           |                  |           |
| O(1)–S(1)–O(2)      | 117.42(9) | O(2)–S(1)–C(7)  | 108.13(9) | O(3)–S(2)–C(19)  | 107.39(9) |
| O(1)–S(1)–C(1)      | 108.14(9) | C(1)–S(1)–C(7)  | 106.56(9) | O(4)–S(2)–C(13)  | 107.71(9) |
| O(1)–S(1)–C(7)      | 108.21(9) | O(3)–S(2)–O(4)  | 117.98(9) | O(4)–S(2)–C(19)  | 107.46(9) |
| O(2)–S(1)–C(1)      | 107.89(9) | O(3)–S(2)–C(13) | 107.16(9) | C(13)–S(2)–C(19) | 108.89(9) |

**Table S2** Selected hydrogen bond lengths (Å) and angles (°) for **2(4-aminophenylsulfone)·CH<sub>2</sub>Cl<sub>2</sub>**

| D–H···A             | <i>d</i> (D–H) | <i>d</i> (H···A) | <i>d</i> (D···A) | ∠(DHA) |
|---------------------|----------------|------------------|------------------|--------|
| N(1)–H(1B)···O(3)#1 | 0.86           | 2.13             | 2.962(3)         | 164    |
| N(1)–H(1C)···O(2)#2 | 0.86           | 2.21             | 3.005(3)         | 155    |
| N(2)–H(2B)···O(1)#3 | 0.86           | 2.28             | 3.086(3)         | 156    |
| N(3)–H(3B)···O(3)#3 | 0.86           | 2.24             | 3.053(3)         | 157    |
| N(3)–H(3C)···O(1)#4 | 0.86           | 2.54             | 3.216(3)         | 136    |
| N(4)–H(4B)···O(1)#1 | 0.86           | 2.60             | 3.333(3)         | 144    |
| N(4)–H(4C)···O(4)#1 | 0.86           | 2.16             | 3.014(3)         | 171    |

Symmetry transformations used to generate equivalent atoms: #1  $-x, 1/2 + y, 3/2 - z$ ; #2  $1 - x, 1/2 + y, 3/2 - z$ ; #3  $1 + x, y, z$ ; #4  $x, 3/2 - y, -1/2 + z$
